# Supplementary material
Source: publisher site journal article supplement (https://bdj.pensoft.net/lib/ajax_srv/article_elements_srv.php?action=download_suppl_file&instance_id=750268)
Supplement: Supplementary file [file article_elements_srv.php]

Jun 1, 2007 - Jun 1, 2008

# Language

All Sessions  
100.00%

+ Add Segment

Explorer

Summary

| Language                  | Acquisition                                      |                                                 |                                                  | Behavior                                        |                                            |                                                  | Conversions                                |                                      |                                                |
|---------------------------|--------------------------------------------------|-------------------------------------------------|--------------------------------------------------|-------------------------------------------------|--------------------------------------------|--------------------------------------------------|--------------------------------------------|--------------------------------------|------------------------------------------------|
|                           | Sessions                                         | % New Sessions                                  | New Users                                        | Bounce Rate                                     | Pages / Session                            | Avg. Session Duration                            | Goal Conversion Rate                       | Goal Completions                     | Goal Value                                     |
|                           | <b>97,172</b><br>% of Total:<br>100.00% (97,172) | <b>26.71%</b><br>Site Avg:<br>26.65%<br>(0.24%) | <b>25,956</b><br>% of Total:<br>100.24% (25,893) | <b>20.11%</b><br>Site Avg:<br>20.11%<br>(0.00%) | <b>13.93</b><br>Site Avg:<br>13.93 (0.00%) | <b>00:14:37</b><br>Site Avg:<br>00:14:37 (0.00%) | <b>0.00%</b><br>Site Avg: 0.00%<br>(0.00%) | <b>0</b><br>% of Total:<br>0.00% (0) | <b>\$0.00</b><br>% of Total:<br>0.00% (\$0.00) |
| 1. <a href="#">en-us</a>  | <b>33,434</b> (34.41%)                           | 26.81%                                          | 8,962 (34.53%)                                   | 19.67%                                          | 12.16                                      | 00:12:46                                         | 0.00%                                      | 0 (0.00%)                            | \$0.00 (0.00%)                                 |
| 2. <a href="#">es</a>     | <b>22,796</b> (23.46%)                           | 23.58%                                          | 5,375 (20.71%)                                   | 21.88%                                          | 16.38                                      | 00:16:41                                         | 0.00%                                      | 0 (0.00%)                            | \$0.00 (0.00%)                                 |
| 3. <a href="#">pt-br</a>  | <b>16,586</b> (17.07%)                           | 30.07%                                          | 4,987 (19.21%)                                   | 18.14%                                          | 13.99                                      | 00:14:35                                         | 0.00%                                      | 0 (0.00%)                            | \$0.00 (0.00%)                                 |
| 4. <a href="#">fr</a>     | <b>5,962</b> (6.14%)                             | 22.26%                                          | 1,327 (5.11%)                                    | 24.05%                                          | 12.82                                      | 00:14:41                                         | 0.00%                                      | 0 (0.00%)                            | \$0.00 (0.00%)                                 |
| 5. <a href="#">es-es</a>  | <b>3,993</b> (4.11%)                             | 28.55%                                          | 1,140 (4.39%)                                    | 18.08%                                          | 16.45                                      | 00:18:44                                         | 0.00%                                      | 0 (0.00%)                            | \$0.00 (0.00%)                                 |
| 6. <a href="#">de</a>     | <b>2,840</b> (2.92%)                             | 29.96%                                          | 851 (3.28%)                                      | 22.43%                                          | 13.57                                      | 00:12:28                                         | 0.00%                                      | 0 (0.00%)                            | \$0.00 (0.00%)                                 |
| 7. <a href="#">en</a>     | <b>1,889</b> (1.94%)                             | 27.10%                                          | 512 (1.97%)                                      | 18.58%                                          | 10.47                                      | 00:13:29                                         | 0.00%                                      | 0 (0.00%)                            | \$0.00 (0.00%)                                 |
| 8. <a href="#">zh-cn</a>  | <b>1,312</b> (1.35%)                             | 20.27%                                          | 266 (1.02%)                                      | 13.95%                                          | 16.96                                      | 00:16:13                                         | 0.00%                                      | 0 (0.00%)                            | \$0.00 (0.00%)                                 |
| 9. <a href="#">en-gb</a>  | <b>1,139</b> (1.17%)                             | 22.48%                                          | 256 (0.99%)                                      | 18.70%                                          | 11.34                                      | 00:14:59                                         | 0.00%                                      | 0 (0.00%)                            | \$0.00 (0.00%)                                 |
| 10. <a href="#">it</a>    | <b>1,012</b> (1.04%)                             | 21.74%                                          | 220 (0.85%)                                      | 15.81%                                          | 20.67                                      | 00:22:53                                         | 0.00%                                      | 0 (0.00%)                            | \$0.00 (0.00%)                                 |
| 11. <a href="#">zh-tw</a> | <b>821</b> (0.84%)                               | 28.87%                                          | 237 (0.91%)                                      | 24.97%                                          | 14.10                                      | 00:13:24                                         | 0.00%                                      | 0 (0.00%)                            | \$0.00 (0.00%)                                 |
| 12. <a href="#">es-ar</a> | <b>754</b> (0.78%)                               | 25.20%                                          | 190 (0.73%)                                      | 19.23%                                          | 20.48                                      | 00:17:44                                         | 0.00%                                      | 0 (0.00%)                            | \$0.00 (0.00%)                                 |
| 13. <a href="#">ja</a>    | <b>605</b> (0.62%)                               | 40.50%                                          | 245 (0.94%)                                      | 20.17%                                          | 9.40                                       | 00:06:23                                         | 0.00%                                      | 0 (0.00%)                            | \$0.00 (0.00%)                                 |
| 14. <a href="#">pl</a>    | <b>440</b> (0.45%)                               | 29.32%                                          | 129 (0.50%)                                      | 26.59%                                          | 11.82                                      | 00:11:47                                         | 0.00%                                      | 0 (0.00%)                            | \$0.00 (0.00%)                                 |
| 15. <a href="#">nl</a>    | <b>414</b> (0.43%)                               | 43.96%                                          | 182 (0.70%)                                      | 20.05%                                          | 8.85                                       | 00:08:18                                         | 0.00%                                      | 0 (0.00%)                            | \$0.00 (0.00%)                                 |
| 16. <a href="#">sv</a>    | <b>369</b> (0.38%)                               | 17.07%                                          | 63 (0.24%)                                       | 11.65%                                          | 9.45                                       | 00:16:21                                         | 0.00%                                      | 0 (0.00%)                            | \$0.00 (0.00%)                                 |
| 17. <a href="#">ru</a>    | <b>348</b> (0.36%)                               | 43.97%                                          | 153 (0.59%)                                      | 24.43%                                          | 9.49                                       | 00:08:53                                         | 0.00%                                      | 0 (0.00%)                            | \$0.00 (0.00%)                                 |
| 18. <a href="#">ko</a>    | <b>320</b> (0.33%)                               | 26.25%                                          | 84 (0.32%)                                       | 21.25%                                          | 16.55                                      | 00:13:42                                         | 0.00%                                      | 0 (0.00%)                            | \$0.00 (0.00%)                                 |
| 19. <a href="#">cs</a>    | <b>306</b> (0.31%)                               | 40.52%                                          | 124 (0.48%)                                      | 27.45%                                          | 19.24                                      | 00:13:21                                         | 0.00%                                      | 0 (0.00%)                            | \$0.00 (0.00%)                                 |
| 20. <a href="#">sv-se</a> | <b>293</b> (0.30%)                               | 15.36%                                          | 45 (0.17%)                                       | 8.19%                                           | 17.29                                      | 00:32:29                                         | 0.00%                                      | 0 (0.00%)                            | \$0.00 (0.00%)                                 |
| 21. <a href="#">de-de</a> | <b>193</b> (0.20%)                               | 32.64%                                          | 63 (0.24%)                                       | 12.44%                                          | 16.12                                      | 00:16:12                                         | 0.00%                                      | 0 (0.00%)                            | \$0.00 (0.00%)                                 |
| 22. <a href="#">fr-fr</a> | <b>188</b> (0.19%)                               | 18.09%                                          | 34 (0.13%)                                       | 30.85%                                          | 5.21                                       | 00:14:12                                         | 0.00%                                      | 0 (0.00%)                            | \$0.00 (0.00%)                                 |
| 23. <a href="#">pt</a>    | <b>145</b> (0.15%)                               | 57.24%                                          | 83 (0.32%)                                       | 28.28%                                          | 7.88                                       | 00:09:35                                         | 0.00%                                      | 0 (0.00%)                            | \$0.00 (0.00%)                                 |
| 24. <a href="#">ja-jp</a> | <b>125</b> (0.13%)                               | 26.40%                                          | 33 (0.13%)                                       | 7.20%                                           | 10.98                                      | 00:12:50                                         | 0.00%                                      | 0 (0.00%)                            | \$0.00 (0.00%)                                 |
| 25. <a href="#">fi</a>    | <b>124</b> (0.13%)                               | 20.16%                                          | 25 (0.10%)                                       | 11.29%                                          | 9.47                                       | 00:12:00                                         | 0.00%                                      | 0 (0.00%)                            | \$0.00 (0.00%)                                 |

© 2014 Google
